# Supplementary material for: Theoretical perspective of performance-limiting parameters of Cu(In1−xGax)Se2-based photocathodes
Source: Royal Society of Chemistry journal article supplement (doi:10.1039/d0ta02862b), 2020-01-01
Supplement: d0ta02862b1.pdf [file d0ta02862b1.pdf]

# Supplementary Material for Theoretical Perspective of Performance-limiting Parameters in Cu(In<sub>1-x</sub>Ga<sub>x</sub>)Se<sub>2</sub>-based Photocathodes

Vikas Nandal,<sup>1\*</sup> Yohichi Suzuki,<sup>1,2</sup> Hiroyuki Kobayashi,<sup>3,4</sup> Kazunari Domen,<sup>4,5</sup> and

Kazuhiko Seki<sup>1\*</sup>

<sup>1</sup>*Nanomaterials Research Institute, National Institute of Advanced Industrial Science and Technology, 1-1-1 Higashi, Tsukuba, Ibaraki 305-8565, Japan*

<sup>2</sup>*Quantum Computing Center, Keio University, 3-14-1 Hiyoshi, Kohoku-ku, Yokohama, Kanagawa, 223-8522, Japans*

<sup>3</sup>*FUJIFILM Corporation Frontier Core-Technology Laboratories Research & Development Management Headquarters, 577 Ushijima, Kaisei, Kanagawa 2588577, Japan*

<sup>4</sup>*Department of Chemical System Engineering, School of Engineering, The University of Tokyo, 7-3-1 Hongo, Bunkyo-ku, Tokyo 113-8656, Japan*

<sup>5</sup>*Center for Energy & Environmental Science, Interdisciplinary Cluster for Cutting Edge Research, Shinshu University, 4-17-1 Wakasato, Nagano-shi, Nagano 380-8553, Japan*

**Table S1.** Material parameters used in electrical simulations of CdS/Cu(In<sub>1-x</sub>Ga<sub>x</sub>)Se<sub>2</sub>-based photocathodes.

| Parameters                                                  | CdS                                                | Cu(In <sub>1-x</sub> Ga <sub>x</sub> )Se <sub>2</sub>         |
|-------------------------------------------------------------|----------------------------------------------------|---------------------------------------------------------------|
| Thickness                                                   | 70 nm {ref. 1}                                     | 1800 nm {ref. 1}                                              |
| Effective density of states for conduction and valence band | 10 <sup>19</sup> cm <sup>-3</sup> {ref. 2}         | 10 <sup>19</sup> cm <sup>-3</sup> {ref. 2}                    |
| Mole fraction x                                             | -                                                  | 0-1                                                           |
| Dielectric constant                                         | 10 {ref. 1,2}                                      | 13.6 {ref. 1}                                                 |
| Doping density                                              | 10 <sup>16</sup> cm <sup>-3</sup> (Donor) {ref. 1} | 10 <sup>16</sup> cm <sup>-3</sup> (Acceptor) {ref. 1}         |
| Electron affinity                                           | 3.8 eV                                             | 3.5 (x=0) to 4.2 (x=1) eV <sup>1</sup>                        |
| Energy band gap                                             | 2.4 eV {ref. 1}                                    | 0.98 (x=0) to 1.5 (x=1) <sup>1</sup>                          |
| Electron mobility                                           | 100 cm <sup>2</sup> /(Vs) {ref. 2}                 | 100 cm <sup>2</sup> /(Vs) {ref. 2}                            |
| Hole mobility                                               | 25 cm <sup>2</sup> /(Vs) {ref. 2}                  | 25 cm <sup>2</sup> /(Vs) {ref. 2}                             |
| Bulk defect density/carrier lifetime                        | -                                                  | 10 <sup>13</sup> ,10 <sup>14</sup> cm <sup>-3</sup> /1,0.1 μs |

## Parameterization of Optical Constants:

The Forouhi–Bloomer (FB) dispersion relation is generally used to obtain optical constants like the refractive index  $n(E)$  and extinction coefficient  $k(E)$  of crystalline semiconductors<sup>3,4</sup> and is given as

$$k(E) = \left[ \sum_{i=1}^m \frac{A_i}{E^2 - B_i E + C_i} \right] (E - E_g)^2, \quad (1)$$

$$n(E) = n_\infty + \sum_{i=1}^m \frac{B'_i E + C'_i}{E^2 - B_i E + C_i}. \quad (2)$$

Here,  $E_g$  is the onset energy of optical absorption,  $n_\infty$  is the refractive index in the high frequency range, and the independent parameters  $A_i$ ,  $B_i$  and  $C_i$  characterize distinct interband transitions. Every summation term in eq. 1 and 2 is the contribution from either a peak or shoulder in the spectra of extinction coefficient  $k$  and refractive index  $n$ . The upper limit  $m$  is the number of different curvatures observed in optical constant  $k$ . The dependent parameters  $B'_i$  and  $C'_i$  in eq. 2 are calculated using following expressions:

$$B'_i = \frac{A_i}{Q_i} \left[ -\frac{B_i^2}{2} + E_g B_i - E_g^2 + C_i \right],$$

$$C'_i = \frac{A_i}{Q_i} \left[ \frac{B_i(E_g^2 + C_i)}{2} - 2E_g C_i \right],$$

$$Q_i = \frac{1}{2} \sqrt{4C_i - B_i^2}.$$

Each independent parameter, i.e.,  $E_g$ ,  $n_\infty$ ,  $A_i$ ,  $B_i$  and  $C_i$  is approximated by a second-order polynomial of mole fraction  $x$ ; i.e.,  $q_2x^2 + q_1x + q_0$ , where,  $q_0$ ,  $q_1$ , and  $q_2$  are fitting coefficients. Numerical values of fitting coefficients for respective independent parameters are provided in Table S2.

**Table S2:** Numerical values of coefficients of the second-order polynomial ( $q_2x^2 + q_1x + q_0$ ) used to obtain different parameters for parameterization of optical constants such as refractive index  $n(E)$  and extinction coefficient  $k(E)$  using the Forouhi–Bloomer dispersion relation.<sup>4</sup>

| Parameter          | $q_2$ | $q_1$  | $q_0$ |
|--------------------|-------|--------|-------|
| $A_1$              | 0.032 | -0.128 | 0.117 |
| $B_1(\text{eV})$   | 0.82  | 0.68   | 2.39  |
| $C_1(\text{eV}^2)$ | 1.778 | 0.343  | 1.738 |
| $A_2$              | 0.091 | 0.063  | 0.066 |
| $B_2(\text{eV})$   | -0.54 | 0.69   | 5.90  |
| $C_2(\text{eV}^2)$ | -1.33 | 2.60   | 9.16  |
| $E_g(\text{eV})$   | 0.26  | 0.46   | 0.53  |
| $n_\infty$         | 0.054 | -0.046 | 2.450 |

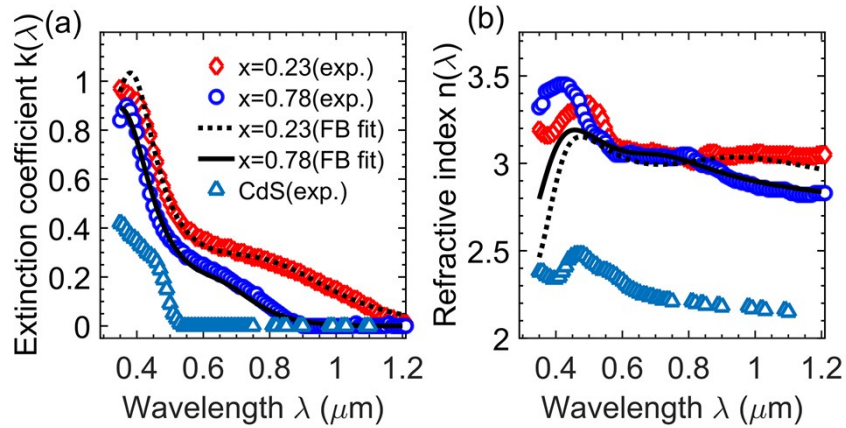

**Figure S1. Parametrization of optical constants using the Forouhi-Bloomer (FB) dispersion relation for CdS/CIGS photocathodes with different mole fraction  $x$ .** Variation of optical constants such as (a) extinction coefficient  $k(\lambda)$  and (b) refractive index  $n(\lambda)$  with wavelength  $\lambda$  for the CIGS layer ( $x=0.23$  and  $0.78$ ) and CdS front window layer. Symbols indicate the extracted experimental data from the literature,<sup>4</sup> while the black solid (for  $x=0.23$ ) and dotted (for  $x=0.78$ ) lines correspond to the FB fit.

The FB fit enables us to calculate optical constants for different  $x$ . For instance, in Fig. S1a, the calculated extinction coefficient  $k$  matches closely with the experimental data over the wavelength range for different  $x$  ( $=0.23$  and  $0.78$ ). Furthermore, Fig. S1b shows that the estimated refractive index  $n$  is in close agreement with actual data at long wavelength, but it deviates at short wavelength ( $<400$  nm). To analyze the effect of the mismatch of  $n$ , we performed optical simulations by incorporating optical constants  $n$  and  $k$  obtained from experiments and the FB fit for  $x=0.23$ .

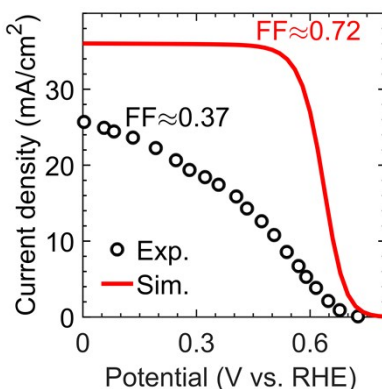

Figure S2. Current potential characteristics (symbols-baseline experimental data; line- simulation) of CdS/CIGS based photocathode with mole fraction  $x=0.5$ . For simulation data, the interface defect density  $N_I = 2.5 \times 10^8 \text{ cm}^{-2}$  and bulk defect density  $N_B = 10^{14} \text{ cm}^{-3}$ .

**Table S3.** Parameters extracted from the comparison of simulation and experimental data of current potential characteristics of CdS/Cu(In<sub>1-x</sub>Ga<sub>x</sub>)Se<sub>2</sub> photocathodes with different mole fraction  $x$ .

| Mole fraction $x$ | Resistance $R_s$ ( $\Omega \text{ cm}^2$ ) | Shunt Resistance $R_{sh}$ ( $\Omega \text{ cm}^2$ ) | Interface defect density $N_I$   | Bulk life time in CIGS $\tau$ ( $\mu\text{s}$ ) | Attenuation constant $A_c$ (%) |
|-------------------|--------------------------------------------|-----------------------------------------------------|----------------------------------|-------------------------------------------------|--------------------------------|
| 0                 | 8.5                                        | 25                                                  | -                                | 1                                               | 73.43                          |
| 0.5               | 12                                         | 55                                                  | $3 \times 10^8 \text{ cm}^{-2}$  | 1                                               | 86.27                          |
| 0.7               | 15                                         | 168                                                 | $12 \times 10^8 \text{ cm}^{-2}$ | 0.1                                             | 61.06                          |
| 1                 | 25                                         | 500                                                 | $4 \times 10^8 \text{ cm}^{-2}$  | 0.1                                             | 25                             |

## References:

- (1) Kobayashi, H.; Sato, N.; Orita, M.; Kuang, Y.; Kaneko, H.; Minegishi, T.; Yamada, T.; Domen, K. Development of Highly Efficient CuIn<sub>0.5</sub>Ga<sub>0.5</sub>Se<sub>2</sub>-Based Photocathode and Application to Overall Solar Driven Water Splitting. *Energy Environ. Sci.* **2018**, *11* (10), 3003–3009. <https://doi.org/10.1039/C8EE01783B>.
- (2) Chirilă, A.; Buecheler, S.; Pianezzi, F.; Bloesch, P.; Gretener, C.; Uhl, A. R.; Fella, C.; Kranz, L.; Perrenoud, J.; Seyrling, S.; et al. Highly Efficient Cu(In,Ga)Se<sub>2</sub> Solar Cells Grown on Flexible Polymer Films. *Nat. Mater.* **2011**, *10* (11), 857–861. <https://doi.org/10.1038/nmat3122>.
- (3) Forouhi, A. R.; Bloomer, I. Optical Properties of Crystalline Semiconductors and Dielectrics. *Phys. Rev. B* **1988**, *38* (3), 1865–1874. <https://doi.org/10.1103/PhysRevB.38.1865>.
- (4) Orgassa, K. *Coherent Optical Analysis of the ZnO/CdS/Cu(In,Ga)Se<sub>2</sub> Thin Film Solar Cell*; Berichte aus der Halbleitertechnik; Shaker, 2004.
